# Supplementary material for: Gamma-Aminobutyric Acid Accumulation Contributes to Citrus sinensis Response against ‘Candidatus Liberibacter Asiaticus’ via Modulation of Multiple Metabolic Pathways and Redox Status
Source: MDPI journal article supplement (doi:10.3390/plants12213753), 2023-11-02
Supplement: s1 [file s1]

Supplementary Materials

# **Gamma-aminobutyric acid accumulation contributes to *Citrus sinensis* response against ‘*Candidatus Liberibacter asiaticus*’ via modulation of multiple metabolic pathways and redox status**

**Yasser Nehela <sup>1,2</sup> and Nabil Killiny <sup>1</sup>**

<sup>1</sup> Department of Plant Pathology, Citrus Research and Education Center, University of Florida, 700 Experiment Station Rd., Lake Alfred, FL 33850; nabilkilliny@ufl.edu (NK), yasser.nehela@agr.tanta.edu.eg (YN)

<sup>2</sup> Department of Agricultural Botany, Faculty of Agriculture, Tanta University, Tanta 31527, Egypt.

\* Correspondence: nabilkilliny@ufl.edu

**Table S1.** Primers used for gene expression analysis by real time RT-PCR in this study <sup>a</sup>.

| Gene                                                                        | Abbreviation        | Pathway        | Accession ID   |   | Primer<br>(Forward and Reverse) |
|-----------------------------------------------------------------------------|---------------------|----------------|----------------|---|---------------------------------|
| $\gamma$ -Aminobutyrate (GABA) permease (aka amino-acid permease BAT1-like) | <i>CsgabP</i>       | GABA shunt     | XM_006468698.3 | F | TTCATCCCCGGACCTTTCAA            |
|                                                                             |                     |                |                | R | CGAGCACTGAAGATCCAAGC            |
| GABA transaminase 3                                                         | <i>CsgabT</i>       | GABA shunt     | XM_006481305.2 | F | CTCCTGAATGGGGATAGGT             |
|                                                                             |                     |                |                | R | TGCTGGGACTTGAGTTCCTT            |
| GABA dehydrogenase (aka succinate-semialdehyde dehydrogenase [SSADH])       | <i>CsgabD</i>       | GABA shunt     | XM_006493686.2 | F | CAACGTACATGGCGTGTCTC            |
|                                                                             |                     |                |                | R | CTGGCCCATCATTTTCTGTT            |
| Glutamate decarboxylase-like                                                | <i>CsGAD</i>        | GABA shunt     | NM_001288909.1 | F | ATAGCCCGACTGTTCAATGC            |
|                                                                             |                     |                |                | R | ATTTCTCCAGCAGACCTGA             |
| Glutamate decarboxylase 5-like                                              | <i>CsGAD5</i>       | GABA shunt     | XM_006478039.2 | F | CCTTGACGGGAGAATTTGAG            |
|                                                                             |                     |                |                | R | GCCGTACTTGTGACCACTGA            |
| Glutamate dehydrogenase 1                                                   | <i>CsGDH1</i>       | GABA shunt     | XM_006479045.2 | F | CTTTGAGTGGGTGCAGAACA            |
|                                                                             |                     |                |                | R | CTCAAGCTTCCCAACCTCTG            |
| Glutamate dehydrogenase 2                                                   | <i>CsGDH2</i>       | GABA shunt     | XM_006477017.2 | F | CTCACCAGAGGTGTTACCG             |
|                                                                             |                     |                |                | R | CCAAAACCTTGGATAGCAAA            |
| 5-Oxoprolinase                                                              | <i>CsOXP1</i>       | GABA shunt     | XM_006478626.2 | F | ATCCCTCCAGGCTCATTTCT            |
|                                                                             |                     |                |                | R | CACCTCCACCTCCGATTGTT            |
| Glutamate synthase [NADH], amyloplastic                                     | <i>CsGS</i>         | GABA shunt     | XM_006490447.2 | F | GCTCAACCCATGCGTATCTT            |
|                                                                             |                     |                |                | R | CGAACCAGAGCTCAAGGAC             |
| Glutamate 5-kinase                                                          | <i>CsG5K</i>        | GABA shunt     | XM_006483017.2 | F | ACGGTAACCAGACAGCAACC            |
|                                                                             |                     |                |                | R | CCAGGTCTCTTGCTCCAATC            |
| $\gamma$ -Glutamyltranspeptidase 1-like                                     | <i>Csy-GT1-like</i> | GABA shunt     | XM_006464249.2 | F | GTGGCTCCAACAACACAGA             |
|                                                                             |                     |                |                | R | GCATAAAGGATCTCCACCA             |
| $\gamma$ -Glutamyltranspeptidase 3                                          | <i>Csy-GT3</i>      | GABA shunt     | XM_006475300.2 | F | TGGAGTTCCCGGTGAGATAG            |
|                                                                             |                     |                |                | R | CCATTTGTGCAAACTTGG              |
| $\gamma$ -Glutamyltranspeptidase 3-like                                     | <i>Csy-GT3-like</i> | GABA shunt     | XM_006475299.2 | F | TGGAGGACTCTGTTCCAACC            |
|                                                                             |                     |                |                | R | CAGGCTCTGAGCAAGCTTTT            |
| $\gamma$ -Glutamylcyclotransferase-1                                        | <i>Csy-GCT-1</i>    | GABA shunt     | XM_006478365.2 | F | ACTACGAGAGGCTCCCAATT            |
|                                                                             |                     |                |                | R | TCGATTGCCACGTACTCTTG            |
| $\gamma$ -Glutamylcyclotransferase-2                                        | <i>Csy-GCT-2</i>    | GABA shunt     | XM_006484538.2 | F | CAGCTTTATCGATCGCTTCC            |
|                                                                             |                     |                |                | R | GGATCAGTTGTGGTTCGAG             |
| Glutamate-cysteine ligase, chloroplastic <sup>b</sup>                       | <i>Csy-GCL</i>      | GABA shunt     | XM_006476514.1 | F | CGGAGGATGCTGTTGTTGTA            |
|                                                                             |                     |                |                | R | CTCCCAATCGAACCCTCAG             |
| Glutaminyl-peptide cyclotransferase <sup>c</sup>                            | <i>CsQPCT</i>       | GABA shunt     | XM_006490569.2 | F | CGGTTCTTCAGTTCGGAGAG            |
|                                                                             |                     |                |                | R | CCCAACCATCTTTCATCTG             |
| Pyrrolidone-carboxylate peptidase 1 <sup>d</sup>                            | <i>CsPCP1</i>       | GABA shunt     | XM_006480219.2 | F | CCATTTTCTGCTGATGGT              |
|                                                                             |                     |                |                | R | GGCACATGAACGAAGAGTGA            |
| Tyrosine decarboxylase 1                                                    | <i>CsTDC1</i>       | Amino acids    | XM_006479363.2 | F | GCTCAGTGCTGCTCTCAACA            |
|                                                                             |                     |                |                | R | CCTTATCACGAGCAGCCAA             |
| Arginine decarboxylase-like                                                 | <i>CsADC</i>        | Amino acids    | XM_006487236.2 | F | GTCCCTTCAGTCAGCCTTTG            |
|                                                                             |                     |                |                | R | TGCACAAGCAACTCATAGCC            |
| Argininosuccinate lyase, chloroplastic                                      | <i>CsASL</i>        | Amino acids    | XM_006472396.2 | F | TGAGCCAAAGCACAAGACTG            |
|                                                                             |                     |                |                | R | GTGCTGATCAAACCTGTGT             |
| Argininosuccinate synthase, chloroplastic                                   | <i>CsASS</i>        | Amino acids    | XM_006476944.2 | F | AGTCTCGGGAATCCCTGTGT            |
|                                                                             |                     |                |                | R | AAGGACTCAAGCTCTCTGCAC           |
| $\delta$ -1-Pyrroline-5-carboxylate dehydrogenase 12A1                      | <i>CsP5CDH</i>      | Amino acids    | XM_006476581.1 | F | TGCCAAAGGTCTCCAATTTT            |
|                                                                             |                     |                |                | R | GGACCATAAGGCCAAGCATA            |
| Proline dehydrogenase 1, mitochondrial-like                                 | <i>CsProDH</i>      | Amino acids    | XM_006482264.1 | F | TTGCAGGGATTCTCCAAC              |
|                                                                             |                     |                |                | R | CTGCAATCCGAGAAAAGAGG            |
| Serine acetyltransferase 1, chloroplastic-like                              | <i>CsSAT1</i>       | Amino acids    | XM_006474855.2 | F | AAGAGACCTGCGTGCAATA             |
|                                                                             |                     |                |                | R | AAAGTAACCCACGTCCGAT             |
| Serine acetyltransferase 5                                                  | <i>CsSAT5</i>       | Amino acids    | XM_006475346.2 | F | GAGCTCAGTACCCATCTCC             |
|                                                                             |                     |                |                | R | AGAGAGTGGAGAGAAGCGTG            |
| Cysteine synthase                                                           | <i>CsCysK</i>       | Amino acids    | XM_006471676.1 | F | CCAGCTGCTTGACATTGTT             |
|                                                                             |                     |                |                | R | AGCAGGGTTCATCATCTCC             |
| Methionine synthase 2 <sup>e</sup>                                          | <i>CsMS2</i>        | Amino acids    | XM_006479085.2 | F | GTCCATGGAGAGCCTGAGAG            |
|                                                                             |                     |                |                | R | ATGGTGACAGGGCCAGTAAG            |
| Cystathionine gamma-synthase 1, chloroplastic                               | <i>CsCGS</i>        | Amino acids    | XM_006482566.3 | F | AGATGGAACCTTTGCCACAC            |
|                                                                             |                     |                |                | R | GAGAGCACCAACCCAAACAT            |
| Cystathionine beta-lyase, chloroplastic                                     | <i>CsCBL</i>        | Amino acids    | XM_006492446.3 | F | GCAGGTGTGCTTGCTGTAAA            |
|                                                                             |                     |                |                | R | GTCCAGGATGTTGAGGAGA             |
| Chorismate synthase                                                         | <i>CsCS</i>         | Salicylic acid | XM_006485798.2 | F | ACTGGAACCCCATCCATGT             |
|                                                                             |                     |                |                | R | GAAATGAAGCCATCCAGAA             |
| Chorismate mutase                                                           | <i>CsCM</i>         | Salicylic acid | XM_006482655.2 | F | GGGAGCTTGCTTGATTCTTG            |
|                                                                             |                     |                |                | R | GTACGCAGCTTGATGTTGGA            |
| Arogenate dehydratase/prephenate dehydratase 1, chloroplastic               | <i>CsADT</i>        | Salicylic acid | XM_006467360.2 | F | TTGGTGCCTAACAGATGTGG            |
|                                                                             |                     |                |                | R | CCTTGTGAAAGCCAGAGGAC            |
| Aspartate aminotransferase, cytoplasmic-like                                | <i>CsAST</i>        | Salicylic acid | XM_006476023.2 | F | GCTTCTCCAAGCATCTGTCT            |
|                                                                             |                     |                |                | R | GTTTGAGCGGACTCCATCAT            |
| Tyrosine aminotransferase                                                   | <i>CsTAT</i>        | Salicylic acid | XM_006469841.1 | F | GTGGAATTCAGGGCTATCG             |
|                                                                             |                     |                |                | R | TCGAGATGGTATGTGTTGC             |
| Isochorismate synthase                                                      | <i>CsICS</i>        | Salicylic acid | XM_006476586.2 | F | TGCCGGAACAGGGATAGTAG            |
|                                                                             |                     |                |                | R | CTTGGTGAACTGCACAATGG            |
| Phenylalanine ammonia-lyase                                                 | <i>CsPAL</i>        | Salicylic acid | XM_006481431.2 | F | GTTCTGGCCTGGCTTCTATG            |
|                                                                             |                     |                |                | R | ATAAGAGCTGCCATCGAGGA            |
| 3-Ketoacyl-CoA thiolase 2                                                   | <i>CsKAT2</i>       | Salicylic acid | XM_006489736.1 | F | GGGTACAGTTTGGCACCAG             |
|                                                                             |                     |                |                | R | CAGGCACAGTTTCTGAACCA            |

|                                                                         |                    |                |                |   |                       |
|-------------------------------------------------------------------------|--------------------|----------------|----------------|---|-----------------------|
| Alcohol acyl transferase                                                | <i>CsAAT</i>       | Salicylic acid | NM_001288910.1 | F | CTCGTGTGTGATGTGCGTCTT |
|                                                                         |                    |                |                | R | TGGCCTCTCCGGAACATTATA |
| $\omega$ -3-Fatty acid desaturase                                       | <i>CsFAD</i>       | Jasmonic acid  | XM_006480990.2 | F | CAGATCCCGCATTACCACTT  |
|                                                                         |                    |                |                | R | GGTATCGGTCCCGATTCTT   |
| Lipoxygenase                                                            | <i>CsLOX</i>       | Jasmonic acid  | XM_006483993.1 | F | TGGCTGTCCAAGCACTCTG   |
|                                                                         |                    |                |                | R | CAGCACCACATCTGCCTTTA  |
| Allene oxide synthase                                                   | <i>CsAOS</i>       | Jasmonic acid  | NM_001288906.1 | F | GTTTCAGCTCGCTCCGTTAC  |
|                                                                         |                    |                |                | R | GAGGTTGTGACACGCTTCCT  |
| Allene oxide cyclase                                                    | <i>CsAOC</i>       | Jasmonic acid  | NW_006260521.1 | F | GCGAGTGGGAATTACAGCAG  |
|                                                                         |                    |                |                | R | TTAACCTGCCCACTCACTCC  |
| Acetate/butyrate--CoA ligase AAE7                                       | <i>CsAAE7</i>      | Jasmonic acid  | XM_006488806.2 | F | CCACCAGAGGACACAATCCT  |
|                                                                         |                    |                |                | R | CTGAGCTTCGAAAGGGAGTG  |
| 12-Oxophytodienoate reductase 3                                         | <i>CsOPR3</i>      | Jasmonic acid  | XM_006475468.2 | F | TGCCACTTCTCTTGTGTGG   |
|                                                                         |                    |                |                | R | AAATGGTAGCGTCCCTTCT   |
| Acyl-coenzyme A1                                                        | <i>CsACX1</i>      | Jasmonic acid  | XM_006477083.2 | F | ACGGATCATTGAGCTTCGTC  |
|                                                                         |                    |                |                | R | CCAGTGGAGATCCGTAAAA   |
| Enoyl-CoA hydratase, mitochondrial-like                                 | <i>CsAIM</i>       | Jasmonic acid  | XM_006488772.2 | F | TAATCCTCGTGACCCGAGAC  |
|                                                                         |                    |                |                | R | CTCTGCTGACGTCAATCCA   |
| 3-Ketoacyl-CoA thiolase , peroxisomal-like                              | <i>CsKAT</i>       | Jasmonic acid  | XM_006480138.2 | F | ATACCTGTGCGGTGAAGTC   |
|                                                                         |                    |                |                | R | AGGATCAAGCCCCAGTTTCT  |
| Anthranilate synthase alpha subunit 1                                   | <i>CsASA</i>       | Auxins         | XM_015532734.1 | F | TTGAGCTTCAACCGGAGACT  |
|                                                                         |                    |                |                | R | ACTGAAAGTTGCTCGGACT   |
| Anthranilate synthase beta subunit 2                                    | <i>CsASB</i>       | Auxins         | XM_006469235.2 | F | CAATCGCACAGTTGCTCAGT  |
|                                                                         |                    |                |                | R | GCTCAGGGATTGCAGAGAGA  |
| Tryptophan synthase alpha chain, chloroplastic-like                     | <i>CsTSA</i>       | Auxins         | XM_006470948.2 | F | TACGGAAGGAAGCCATCAAG  |
|                                                                         |                    |                |                | R | GGAGTGGTGGGACCTGTAAA  |
| Tryptophan synthase beta chain 1, chloroplastic-like                    | <i>CsTSB</i>       | Auxins         | XM_006493882.2 | F | GTGTTGCATGGTGCTTTGAG  |
|                                                                         |                    |                |                | R | CAGGTCCAACCTCCAGGGTAA |
| Tryptophan aminotransferase-related protein 2-like                      | <i>CsTAA2</i>      | Auxins         | XM_015529685.1 | F | AATGGAACGGGTTGTCTGG   |
|                                                                         |                    |                |                | R | TCATCAGGGATATGGGAAGG  |
| Tryptophan aminotransferase-related protein 4-like                      | <i>CsTAA4</i>      | Auxins         | XM_006473060.2 | F | CGCATCTGGTTGAGTTTGTG  |
|                                                                         |                    |                |                | R | TAGAGCAGCATGACCACTG   |
| Indole-3-pyruvate monooxygenase YUCCA2                                  | <i>CsYUC2</i>      | Auxins         | XM_006466708.2 | F | CTGGCCCTGTAATTGTGTGGT |
|                                                                         |                    |                |                | R | ACGAGGGAATGGCACATAAG  |
| Indole-3-pyruvate monooxygenase YUCCA8                                  | <i>CsYUC8</i>      | Auxins         | XM_006480095.2 | F | CTACGGGTACCCGAGCAAT   |
|                                                                         |                    |                |                | R | ATTTCTTTCCAGCCATGTG   |
| Aromatic-L-amino-acid decarboxylase-like (aka tryptophan decarboxylase) | <i>CsTDC1</i>      | Auxins         | XM_006469752.3 | F | CGACTTTATGGCTGGAAAA   |
|                                                                         |                    |                |                | R | GGGGTGACAACCTATCCTCA  |
| Indole-3-acetaldehyde oxidase-like (aka Acetaldehyde oxidase)           | <i>CsAO1</i>       | Auxins         | XM_006487737.2 | F | GGGATCAGACAGGAATCGAA  |
|                                                                         |                    |                |                | R | CCGCCCCAAGAAGTATTGTA  |
| Zeaxanthin epoxidase                                                    | <i>CsZEP</i>       | Absciscic acid | XM_006466537.2 | F | CGCGTTGTGCTTCTAGGTTT  |
|                                                                         |                    |                |                | R | CGATCACCTTAACCCGAAAA  |
| Violaxanthin de-epoxidase                                               | <i>CsVDE</i>       | Absciscic acid | NM_001288881.1 | F | AATCGCATACCAACCTGCTC  |
|                                                                         |                    |                |                | R | GGTTTGAAGGCAAGCAACAT  |
| Neoxanthin synthase                                                     | <i>CsNSY</i>       | Absciscic acid | NM_001288932.1 | F | AACGTTGACCAAAACCAGACC |
|                                                                         |                    |                |                | R | CTCACTGAGCACCGAAAGTG  |
| 9-cis-Epoxycarotenoid dioxygenase 3                                     | <i>CsNCED</i>      | Absciscic acid | NM_001288935.1 | F | ATGGCGGCAGCACTACTAC   |
|                                                                         |                    |                |                | R | CTGCAGGTGATGGAGGGTAT  |
| Short chain alcohol dehydrogenase                                       | <i>CsABA2</i>      | Absciscic acid | NM_001288867.1 | F | GCAATCTGCTGGCAATAGT   |
|                                                                         |                    |                |                | R | ATGCCAGTAGCTCCACCTGT  |
| Absciscic aldehyde oxidase                                              | <i>CsAAO3</i>      | Absciscic acid | XM_006487736.2 | F | TTCTTTCAGGGGATTCTGTG  |
|                                                                         |                    |                |                | R | CAACCTGTTGGGGTACCAG   |
| 1-Aminocyclopropane-1-carboxylate (ACC) synthase-like                   | <i>CsACS</i>       | Ethylene       | NM_001288902.1 | F | CGAATCCAGGTTGGTTTAGA  |
|                                                                         |                    |                |                | R | TCCTTCGAGATGACATGCTG  |
| ACC oxidase                                                             | <i>CsACO</i>       | Ethylene       | NM_001288883.1 | F | ACCTCGGTGACCAAAATTGAG |
|                                                                         |                    |                |                | R | TTTTTCAAGCAATGCTGGTG  |
| S-Adenosylmethionine decarboxylase                                      | <i>CsSAMDC</i>     | Ethylene       | NM_001288936.1 | F | CCTGAAGGAAAGGCCCTTAG  |
|                                                                         |                    |                |                | R | GGTGGGATTGAAAGAAGCAA  |
| L-ascorbate peroxidase, cytosolic isoform X1                            | <i>CsAPX</i>       | Antioxidant    | XM_015533381.2 | F | CATAGCGAGCTTGTGCTCTG  |
|                                                                         |                    |                |                | R | ATGAGTGGAGCGCAGTTCTT  |
| phospholipid hydroperoxide glutathione peroxidase                       | <i>CsGPX</i>       | Antioxidant    | XM_006476535.2 | F | CAAGCATCTGAAATCCAGCA  |
|                                                                         |                    |                |                | R | GCAAGAAGCTGATCATGCAA  |
| cationic peroxidase 1-like                                              | <i>CscPOX</i>      | Antioxidant    | XM_006481093.2 | F | GTGGCCACACTATTGGCTTT  |
|                                                                         |                    |                |                | R | AGTAGCCCTCGTTTCTGCAA  |
| lignin-forming anionic peroxidase-like                                  | <i>CsliPOX</i>     | Antioxidant    | XM_006470880.2 | F | GCTACCAAAGGCTTGAATGC  |
|                                                                         |                    |                |                | R | ACCATTAGCCGGCACTGAC   |
| peroxidase A2-like                                                      | <i>CsPOX-A2</i>    | Antioxidant    | XM_006494741.3 | F | GCAATCCAGACCCAACACTT  |
|                                                                         |                    |                |                | R | TATTGACAATGGCAGCGGTA  |
| peroxidase 3                                                            | <i>CsPOX3</i>      | Antioxidant    | XM_006469646.3 | F | TTGAAATGGACCCCTGGTAGC |
|                                                                         |                    |                |                | R | CAGACTTGGCAAATTCAGCA  |
| superoxide dismutase [Cu-Zn], chloroplastic                             | <i>CsSOD-Cu/Zn</i> | Antioxidant    | XM_006487937.3 | F | GGCTCACGTTCTCCTCGTAG  |
|                                                                         |                    |                |                | R | AGAGGGGAATTGAGGGAGA   |
| superoxide dismutase [Mn], mitochondrial                                | <i>CsSOD-Mn</i>    | Antioxidant    | XM_006486115.2 | F | GGGCTATTGACACGCATTTT  |
|                                                                         |                    |                |                | R | ACCAGTGGATCCTGATTTGC  |
| superoxide dismutase [Fe] 2, chloroplastic-like                         | <i>CsSOD-Fe</i>    | Antioxidant    | XM_006484979.3 | F | CAGTGCCCAATTACACATTGC |
|                                                                         |                    |                |                | R | TCTCATGGAAATTGGAAGC   |
| superoxide dismutase [Fe] 3, chloroplastic isoform X1                   | <i>CsSOD-Fe3</i>   | Antioxidant    | XM_006484439.3 | F | GGAATGACATCCCCATCATC  |
|                                                                         |                    |                |                | R | ACATCCTTTGCTTGACGCTT  |
| catalase-like isoform X1                                                | <i>CsCAT</i>       | Antioxidant    | XM_006473726.2 | F | AAGGCTTGCAATTGAGAAGGA |
|                                                                         |                    |                |                | R | CGGCCTGAGACCAGTAAGAG  |

|                            |         |                |                |   |                      |
|----------------------------|---------|----------------|----------------|---|----------------------|
| Elongation factor-1 alpha  | CsEF1   | Reference gene | AY498567.1     | F | GGAAGTTCGAGACCACCAAG |
|                            |         |                |                | R | ACACCAAGGGTGAAGCAAG  |
| F-Box/kelch-repeat protein | CsF-box | Reference gene | XM_006482390.1 | F | ACTTGACAGATGGGCTGTCC |
|                            |         |                |                | R | CAGCAACCAATACCGTCT   |

- <sup>a</sup> The listed genes were assembled based on recent available data in GenBank, National Center for Biotechnology Information website (NCBI, <http://www.ncbi.nlm.nih.gov/gene/>).
- <sup>b</sup>  $\gamma$ -Glutamylcysteine synthetase ( $\gamma$ -GCS) from *Arabidopsis thaliana* has been matched as PREDICTED: *Citrus sinensis* glutamate-cysteine ligase, chloroplastic (CsGCL) using the protein-protein BLAST, based on recent available data in GenBank, National Center for Biotechnology Information website (NCBI, <http://www.ncbi.nlm.nih.gov/gene/>).
- <sup>c</sup> Glutaminy cyclase (QC) from *Arabidopsis thaliana* has been matched as PREDICTED: *Citrus sinensis* glutaminy-peptide cyclotransferase (CsQPCT) using the protein-protein BLAST, based on recent available data in GenBank, National Center for Biotechnology Information website (NCBI, <http://www.ncbi.nlm.nih.gov/gene/>).
- <sup>d</sup> Pyroglutamyl-peptidase (PGP) from *Arabidopsis thaliana* has been matched as PREDICTED: *Citrus sinensis* pyrrolidone-carboxylate peptidase 1 (CsPCP1) using the protein-protein BLAST, based on recent available data in GenBank, National Center for Biotechnology Information website (NCBI, <http://www.ncbi.nlm.nih.gov/gene/>).
- <sup>e</sup> Methionine synthase 2 (MS2) from *Arabidopsis thaliana* has been matched as PREDICTED: *Citrus sinensis* 5-methyltetrahydropteroyltriglutamate-homocysteine methyltransferase 1 using the protein-protein BLAST, based on recent available data in GenBank National Center for Biotechnology Information website (NCBI, <http://www.ncbi.nlm.nih.gov/gene/>).
- <sup>f</sup> Ornithine transcarbamylase (OTC) from *Arabidopsis thaliana* has been matched as PREDICTED: *Citrus sinensis* ornithine carbamoyltransferase, chloroplastic (CsOTC) using the protein-protein BLAST, based on recent available data in GenBank, National Center for Biotechnology Information website (NCBI, <http://www.ncbi.nlm.nih.gov/gene/>).
- <sup>g</sup> Para-aminobenzoic acid synthase (PABA synthase) from *Arabidopsis thaliana* has been matched as PREDICTED: *Citrus sinensis* aminodeoxychorismate synthase, chloroplastic (CsADCS) using the protein-protein BLAST, based on recent available data in GenBank National Center for Biotechnology Information website (NCBI, <http://www.ncbi.nlm.nih.gov/gene/>).
